# Supplementary material
Source: publisher figshare collection journal article supplement (https://acs.figshare.com/ndownloader/files/4608913)
Supplement: Supplementary file 1 [file 4608913]

## Supporting Information

### **Rapid Screening of Photocatalysts by Scanning Electrochemical Microscopy**

Joowook Lee, Heechang Ye, Shanlin Pan, and Allen J. Bard

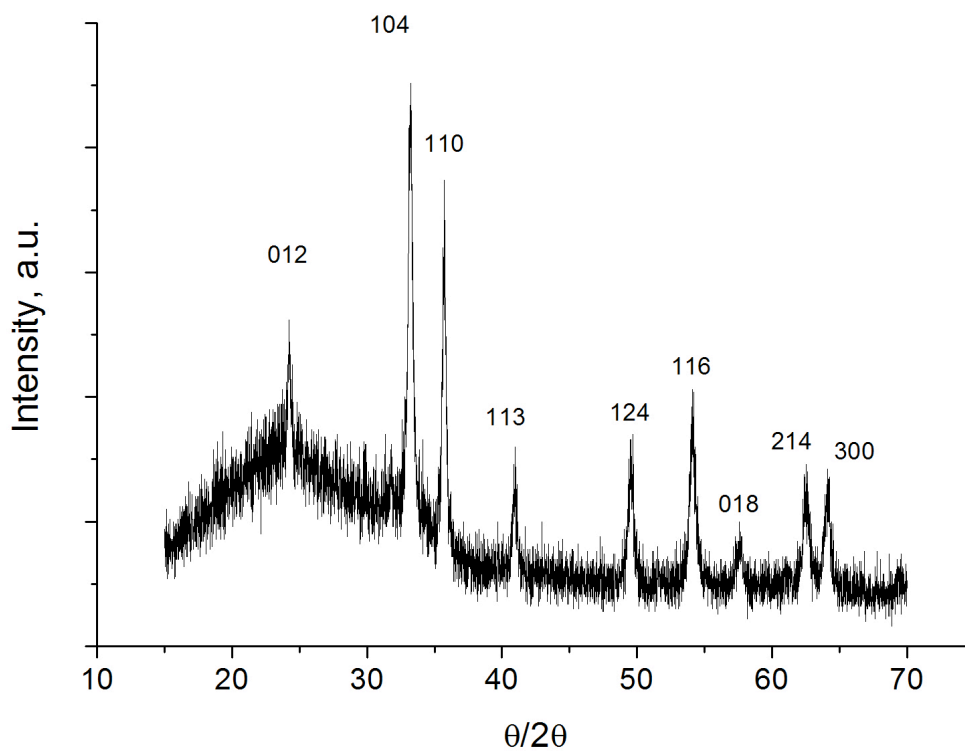

Figure S1. X-ray Diffraction patterns of iron oxide photocatalyst produced via pyrolysis of  $\text{Fe}(\text{NO}_3)_3$ .

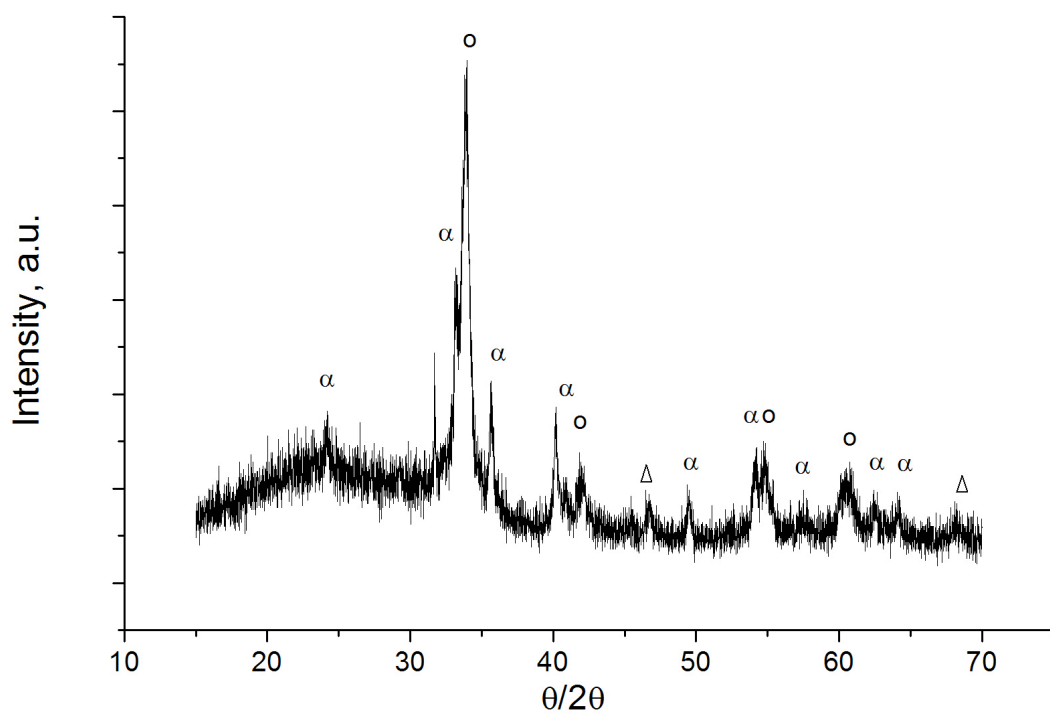

Figure S2. X-ray Diffraction patterns of Fe70/Pd30 photocatalyst.  $\alpha$ ,  $\circ$ , and  $\Delta$  represent peaks for  $\alpha$ -Fe<sub>2</sub>O<sub>3</sub>, PdO and Pd, respectively.
